# Supplementary material
Source: publisher site journal article supplement (https://www.dovepress.com/article/514920)
Supplement: Supplementary file 1 [file Aim%203%20Supplemental%20materials_R1_1.docx]

**Relative Importance of Disease-Modifying Antirheumatic Drug Attributes for Patients with Rheumatoid Arthritis**

**Poudel N1, Qian J1, Graza KB1, Zeng P2, Curtis JR3, Ngorsuraches,S1**

1. Auburn University, Harrison College of Pharmacy
2. Auburn University, Mathematics and Statistics
3. University of Alabama at Birmingham, Department of Medicine - Immunology and Rheumatology

**Appendix I:** Details of search strategy and literature reviewed.

**Table S1.** Search terms used to perform literature search for quantitative studies that identified Rheumatoid Arthritis (RA) or Disease Modifying Antirheumatic Drug (DMARDs) related experience/outcome domains and discrete choice experiment/Conjoint analysis in PubMed (search performed on 11/1/2022)

1. Qualitative studies

|  | **Mesh Terms** | **Number of articles** |
| --- | --- | --- |
| 1 | "Arthritis, Rheumatoid"[Mesh] | 123,013 |
| 2 | "Patient Preference"[Mesh] OR Stated preference methods OR Preference | 417,045 |
| 3 | Patient AND (experience OR satisfaction OR center* OR value* OR Perce* OR perspective) | 3,362,906 |
| 4 | Unmet need | 20,694 |
| 5 | #2 OR #3 OR #4 | 3,709,037 |
| 6 | "Qualitative Research"[Mesh] OR Qualitative* OR "Focus Groups"[Mesh] | 387,350 |
| 7 | #5 AND #6 | 492 |

1. Discrete choice experiment/Conjoint analysis studies

|  | **Mesh Terms** | **Number of articles** |
| --- | --- | --- |
| 1 | "Arthritis, Rheumatoid"[Mesh] | 123,013 |
| 2 | "Patient Preference"[Mesh] OR Stated preference methods OR Preference | 417,045 |
| 3 | Discrete Choice Experiment OR Conjoint OR Choice Model* OR "Choice Behavior"[Mesh] | 123,864 |
| 4 | #1 AND #2 AND #3 | 55 |

**Table S2.** List of studies included to identified RA related experience/outcome domain (n=25).

| Author (year) | Number of patients (Country) | Important experience/outcome domains | Reference |
| --- | --- | --- | --- |
| Carandang et.al., 2020 | 37  (U.S.) | - Experience pain, stiffness, or fatigue - Emotional distress and/or anxiety - Impact physical function   - Reduced quality of activity engagement, require additional time to complete task, avoid certain part of the activity | 1 |
| Serban et.al., 2019 | 60  (U.S.) | - Frustration, anxiety, and depression - Acceptance of treatment - Impact on work life - Impact on social life (hobbies and social activities) - Flare ups - Interaction with other medication and side effects - Numerous hospital appointment as burden - Coping strategy | 2 |
| Barton et.al., 2018 | 19  (U.S.) | - Sadness surrounding the loss of ability to fully engage in everyday activities because of pain or fatigue - Treatment goals involving pain reduction and increased energy, while minimizing side effects - Negative impact on the quality of life | 3 |
| Taylor et.al., 2010 | 2039  (U.S.) | - Pain, depression | 4 |
| Iaquinta et.al., 2005 | (U.S.) | - Pain - Anger, fear, frustration, self-consciousness, depression - Adverse effects of medications, duration of onset of action, need to switch due to medication ineffectiveness - Future outcomes of the disease process - Possible physical deformity and forced dependency - Inability to assume usual personal and professional responsibilities - Being self-conscious, has to change to new lifestyle | 5 |
| Chen et.al., 2022 | 30 (Taiwan) | - Physical suffering   - Always living with pain and stiffness, uncertainty about deformities - Limitation of abilities   - Loss of performing daily activities, loss of social life, loss of physical activities - Coexisting with the disease   - Making changes, comparing with other | 6 |
| Pedraz-Marcos et.al, 2020 | 19  (Spain) | - Helplessness, Life goes on, coping with daily life, home adaptation, self-image, planning | 7 |
| Loyola et.al, 2020 | 13  (Canada) | - Relationship with healthcare providers (Trust) - Perception of medications effects (Benefits and harms) - Understanding of medications mechanism (Alignment with biomedical model, Indigenous knowledge) - Medications administration (Interfering with lifestyle, Invasiveness to the body) - Support and influence from family - Fear and stigma of drug dependency - Affordability and availability (Cost, availability) | 8 |
| Walter et.al., 2017 | 29  (Dutch) | - Perceived stress (associated with pain and functional disability) - Balancing the activities and rest - Medication intake had a negative influence on their general well being - Social stress - Relationship with professionals - Higher disease burden due to comorbidity - Negative impact on the wellbeing, both physically and mentally | 9 |
| Pho et.al., 2017 | 16  (Singapore) | - Altered physical activity and well being   - Severe pain and fatigue   - Struggling to perform activities   - Restriction in basic daily movements - Psychological and emotional challenges   - Anger and frustration   - Sadness, despair, and helplessness   - Worry and fear   - Embarrassment and low self-esteem - Changes in social life   - Interruption to working life   - Disruption of roles and relationships - Various coping strategies   - Medications   - Alternative treatments   - Adaptation and behavioral strategies   - Cognitive strategies - Support received and further support needs   - Support from family, friends, and society   - Support from health care professionals   - Financial counseling and support   - Access to health care services | 10 |
| Flurey et.al., 2017 | 22  (UK) | - Challenges to masculinity   - Reduction in strength and abilities   - Challenges to masculine identity and role   - Loss of power and control - Getting through life with RA   - Just get on with it   - Information seeking   - Destructive behaviors   - Social withdrawal   - Source of support - What type of support is acceptable   - Styles of acceptable support packages   - Who should attend and run a support package | 11 |
| Bala et.al.,  2016 | 10  (Sweden) | - An existence dominated by painful symptoms and treatment - Radical changes and limitations in one’s life - A continual struggle to cope with one’s life and to master the illness - A dependency on those who are close by and the world around | 12 |
| Van Der Elst et.al., 2016 | 26  (Belgium) | - Return to being normal - Aspect of disease control   - Proof of disease control   - Prevention or stabilization of joint damage   - Less medication - Physical aspect - Relief of pain and other physical symptoms - Improve joint function and mobility - Limited side effect - Improve sleep - Aspect of participation - Performing activities of daily living - Engaging in work and/or leisure - Fulfilling family, social, and/or societal roles - Vitality - Mental aspect - Emotional well being - Self and identity - Life enjoyment - Not feeling ill | 13 |
| Ter Wee et.al., 2016 | 18  (Dutch) | - Performing or maintaining their job - Difficulty in coping with the disease (fluctuation) - Influence of the disease on relationship with others, such as partners, children, and friends - Performing activity in daily life and in spare time - Pain, fatigue, emotion | 14 |
| Ebbevi et.al., 2016 | 22  (Sweden) | - Survival - Mortality - Degree of recovery or health - Avoiding physical symptoms - Avoiding aesthetic symptoms - Ability to perform ADL and exercise - Control of chronic disease complications - Time to recovery or return to normal activities - Time to treatment/remission - Time to definitive diagnosis - Time to access specialist treatment - Time spent accessing treatment - Workdays missed - Disutility of care or treatment process - Pain and anxiety before and during treatment - Care complications - Health over time - Sustainability - Long term consequences of care - Avoid long-term side effect | 15 |
| Van Tuyl et.al., 2015 | 47,  (Amsterdam, The Netherlands, Vienna, Austria, UK) | - Symptom - Reduction of pain, stiffness, fatigue, and swelling were mentioned frequently, but also recovery of strength and improved sleep - Impact - Physical functioning, activity of daily living, and being independent - Normality - Reduction in symptom and impact - Being able to work - Family role - Perception of others | 16 |
| Östlund et.al., 2014 | 48  (Sweden) | - Feelings of grief, aggressiveness, fear and shame are emotions closely related to participation restrictions of RA in everyday life. | 17 |
| Flurey et.al., 2014 | 15  (UK) | - Mediating the impact of RA on daily life - Physical impact of RA and its mediation - Emotional impact of RA and its mediation - Redefining me - Retaining independence - Adapting normality’s - Incorporating RA into identity - Cognitive adjustment - Unwelcome reminders - The unpredictable nature of RA - Perception - Trying to make sense of fluctuations - Uncertainty - Avoiding seeking help - Trying to regain control - Crisis management - Social withdrawal - Attributing fluctuation to luck - Losing control - Unimaginable impact - Seeking medical help | 18 |
| Sanderson et.al., 2011 | 26  (UK) | - Pain - Joint damage - Fatigue - Activities of daily living - Mobility | 19 |
| Buitinga et.al., 2012 | 16  (Dutch) | - Dependency on others - Increasing dependency on medication - Inability to walk - Activity limitations - Worsening fatigue | 20 |
| Lacaille et.al., 2007 | 36  (Canada) | - Fatigue - Pain - Physical limitations - Invisibility of arthritis - Variability/fluctuations of symptoms - Unpredictability of flares - Unpredictability of future arthritis progression - Problems related to disease management - Treatment side effects interfering with work performance - Concern about taking time off work for medical appointments - Limited access to multidisciplinary arthritis services outside of working hours - Lack of time/energy for comprehensive arthritis care - Lack of information, resources, and services to help cope with arthritis on daily basis - Lack of help from health care team for dealing with work-related issues - Not using splints/aids/devices useful to manage arthritis at work to maintain invisibility - Self-preserving strategies to cope with pain and fatigue limit potential for advancement, job satisfaction, and personal fulfillment | 21 |
| Ahlmen et.al., 2005 | 25  (Sweden) | - Normal life   - Be looked upon as before. Feel no limitations. Manage normal social roles - Physical capacity   - Reduce pain, stiffness, and fatigue. Increase mobility, grip force and muscle strength - Independence   - Manage daily activities. Care for oneself and family. Manage work and leisure time - Well-being   - Be able to enjoy life. Regain self-confidence. Get psycho-social support - Benefit from treatments   - Experience improvement in symptom severity. Increase levels of ability and activity - Communication with the rheumatology staff   - Obtain good mutual relationship with the rheumatology staff. Receive satisfactory expert treatment - ‘Taking charge’   - Be accepted as experts on living with rheumatoid arthritis. Take own responsibility for their situation - Resources of and access to rheumatology care facilities   - Get resources of rheumatology care. Have access to rehabilitation facilities | 22 |
| Hwang et.al., 2003 | 5  (Korea) | - Severe pain - Limited physical activities - Experience of severe pain - Abruptly decreased physical strength - Deformed body appearance - Self-esteem - Concealment of distorted body - Pretend nothing is amiss - Negative feelings - Sad, Regretful, Annoyed, Anxious, Sensitive, Shameful, Suffering, Resentful, Unfair, Confused, Fearful, Guilty - Reflect the past life - Miss past healthy life - Resent and feel empty to sacrifice themselves to their family - Think about cause of the disease - Concentrate on recovery from disease - Attempt to overcome the disease by self - Try almost every effective treatment - Rely on religion - A comfortable mind in pain - Try to keep comfortable - Try to get out anxiety about the disease - Accept the disease as ‘my life’ - Support of family and others - Thankful for energy gained from support of family - Strengthen will for life through support from others - New life - Desire to live only for self from now - Satisfaction with present physical condition - Desire to give service to the public | 23 |
| Carr et.al.,  2003 | 39  (UK) | - What outcomes are important? - Physical (pain, disability, deformity) - General wellbeing (fatigue, feeling well) - Independence - Return to normality - Emotional impact - Fear of the future - The relative importance of outcomes changes over time and depending on circumstances - What makes you satisfied or dissatisfied with treatment? - Treatment efficacy - Side effects - Patient-health professional communication - Access to care - How do you decide that treatment is working? - Symptom reduction - “Forgetting you have RA” - Change in priorities for outcome over time - Magnitude of improvement/change varies with disease duration | 24 |
| McPherson et.al., 2001 | 10 | - Personal factors - Limitation and restrictions - External factors - Impeded/undermined - Future issue - Negative or limitation restrictions - Perception of normality - Lack of limitation or restriction - Tacking charge - Active engagement in control | 25 |

**Table S3.** List of reviews that were included to identify RA related experience/outcome domain (n=9).

| Author (year) | Type of study | Important experience/outcome domains | Reference |
| --- | --- | --- | --- |
| Bekker et.al., 2021 | Review + focus group | - Medication Adherence - Timing, dosing, accuracy of injection technique, medication knowledge, medication adherence knowledge, medication beliefs, medication concerns, support form healthcare professional, family support, community support, general emotional support, memory forgetfulness, medication effectiveness, medication side effects, safe efficacy - Pathophysiology - Physical: Physical functioning, range of motion, mobility, disease activity, pain, inflammation, organ function, biomarkers, fitness, sexual function - Psychological: Well-being, Fatigue, Anger/irritability, Depression, Helplessness, Satisfaction, Morale, Confidence - Medication side effects - Life impact - Quality of life, ability to work, sleep disruption, social roles, Independence - Economic impact - Cost of disease and treatment, healthcare utilization, productivity loss | 26 |
| Van der Elst et.al, 2020 | Meta synthesis | - A normal life despite RA - Disease control: Relief of symptoms, finding the right treatment, staying stable - Physical performance: Functional ability, performing activities - Self-accomplishment: Self-management, Role fulfillment, Self, and identity - Wellbeing: Emotional wellbeing, positive outlook, vitality | 27 |
| Parenti et.al, 2020 | Meta synthesis | - Physical domain - Symptomatology, treatments, functionality, sexual health - Social domain - Relationships - Healthcare system - Work - Psychological domain - Identity - Power and control - Negative emotions | 28 |
| Donnelly et.al., 2020 | Systematic review | - Cognitive emotional (what we think and feel) - Acceptance, lack of, anger, frustration, irritability, blame, cause, social comparison, depression, sadness, despair, suicide, hope and fears, optimism, positivity, humor, religion and spirituality, self (concept, esteem, efficacy), shame, guilt, embarrassment - Behavioral (What we do; action taken) - Adjustment and adaptation, planning, pacing, self-care, help-seeking - Social (interaction with others and roles) - Invisible illness, domestic roles, employment, economic, gender, loss, loneliness, isolation, personal and social relationships - Environmental (setting in which we manage) - Access and built environment, weather, and temperature) - Physical (the body in which we manage) - Body as ill, deformed, disabled, symptoms - Technological (technologies used to manage) - Assistive devices and aids, Health care professionals and services - Medical treatment | 29 |
| Michaud et.al., 2021 | Systematic review | - Functional disability, - Tender or swollen joints, - Pain, - Patient global assessment - Fatigue | 30 |
| Kelly et.al, 2018 | Systematic review | - Intensifying disease identity - Severity of sudden pharmacotherapy - Signifying deteriorating health - Daunting lifelong therapy - Distressing uncertainties and consequences - Poisoning the body - Doubting efficacy - Conflicting and confusing advice - Prognostic uncertainty with changing treatment regimens - Powerful social influence - Swayed by other’s experiences - Partnering with physicians - Maintaining roles - Confidence in comprehensive and congoing care - Valuing peer support - Privilege and right of access to biologic agents - Expensive medications must be better - Right to receive a biologic - Fearing dispossession - Maintaining control - Complete ownership of decision - Taking extreme risks - Minimizing lifestyle intrusion - Negotiating treatment expectation - Miraculous recovery - Mediocre benefit - Reaching the end of the line | 31 |
| Hulen et.al., | Systematic review | - Bodily experience of RA   - Functionality, pain reduction, lessening of joint swelling and stiffness, increase in energy levels, mitigation of undesired impact of medications, prevention of disease progression, sexuality, and reproduction - Achieving normalcy and maintaining wellness   - Freedom, normalcy, general wellbeing, self-efficacy, mood improvement - Social connectedness and support   - Social support and social connections - Interpersonal and healthcare system interactions   - Effective patient provider communication, ability of support services, access to rheumatologist, RA education, patient centered care, sensitive healthcare delivery, care coordination, primary care access, cost-effective RA care, and trust in healthcare providers | 32 |
| Rendas-Baum et.al, 2014 | Review | - Pain - Fatigue - Physical health (functioning) - Mental health (emotional wellbeing) - Social functioning - Sleep - Work | 33 |
| Hoving et.al., 2013 | Review | - Symptoms and disease and effects on work   - Fatigue and energy, pain and stiffness, physical limitations, unpredictability and invisibility activity arthritis and flares, concentration - Managing arthritis and consequences   - Help, information, access and treatment of arthritis from health care Optimal medical care and importance of healthy lifestyle Importance of disease activity Coping, understanding, adapting and managing disease Awareness of limitations and abilities, balancing work and leisure activities Importance of assertiveness, importance of planning Desire of contact or information from others with disease - Socioeconomic factors   - Job insecurity and financial concerns Support from society, regulations and aid for persons with arthritis Opportunities for part-time work or disability benefits - Work condition and adaptations   - Support or help from employer and/or supervisor: such as active help with looking for solutions, providing adequate work conditions, work accommodation Employer help/advocacy/policies regarding career planning, (re)training, accommodation psychological help: understanding, acceptance, considering needs of the patient Providing flexibility regarding work arrangements, and working time schedules, medical appointments and taking of time Ergonomic assessment and ergonomic adjustments to workplace - Emotional challenges   - Setting boundaries, self-confidence Dealing with feeling like a burden, dealing with reactions colleagues Managing fear and anxiety, guilt, sadness, stress Feelings of dependency or helplessness Impact on personal fulfilment - Interpersonal issues and choices affecting work and family life   - Role of understanding and social support from all actors such as colleagues, supervisors, health care professionals and patient organizations Difficulty with/lack of communication, mistrust and acceptance Relationship with colleagues Dealing with negative comments at work, asking for help, dealing with unsolicited help Reluctance to disclose (consequences of having) arthritis and being honest to colleagues Family and work life balance: challenges and negative effects that occur as a result of maintaining work for family life and in communicating with family - Meaning of work   - Perceptions and meaning of work Desire, value and motivation to work Importance of worker role and identity Work important to well-being Value of work in social environment/friends Diverting attention away from disease Work as rehabilitative factor | 34 |

**Table S4:** List of studies that was included to identified Disease Modifying Antirheumatic Drugs (DMARD) related outcome domain (n=11).

| Author | Number of RA patient | Important domains/Experience | Reference |
| --- | --- | --- | --- |
| Singh et.al., 2021 | 47 (U.S.) | - Efficacy/effectiveness with regard to joint pain, joint destruction, fatigue, energy, sleep, joint stiffness, mobility, quality of life and the ability to function in daily lives - Time to onset of action/mode of action - Side effects/fear of side effects - Cost including out of pocket - Co-payments and patient responsibility - Convenience of use/frequency of use - Doctor opinion - Other drugs/comorbidity/ other patient’s experience/effect on other people, - Fear of needles - Newness of the medication | 35 |
| Barton et.al, 2018 | 19  (U.S.) | - Treatment goals involving pain reduction and increased energy, while minimizing side effects - Quality of life | 3 |
| Binder-Finnema et.al., 2019 | 156 (U.S.) | - Treatment cost and the ability to pay | 36 |
| Andersen et.al., 2019 | 39 (U.S.) | - Side effect seen as the price you pay for improvement - Day to day physical and social function matter more - Patients have difficulty sorting outside effect from other factors - Different DMARDs elicit different safety concern - Concerns are influenced by disease and medication experience, and individual and social factors | 37 |
| Shaw et.al., 2018 | 48 (U.S.) | - Emotional motivation to accept treatment   - Desire to return to the normal life (relief from pain and fatigue, and improve physical functioning), fear of future disability to the RA - Emotional barriers to accept treatment   - Fear of medication (life threatening adverse events), maintaining control over health, denial of sick identity, disappointment with treatment, feeling overwhelmed by the cognitive burden of deciding | 38 |
| Bekker et.al, 2021 | 38 (Canada, Australia, Netherland) | - Protecting and enhancing emotional, physical, and social well being - Medication adherence: (timing, dosing, accuracy of injection technique)   - Motivation to maintain mental and physical fitness so that they were able to maintain their social function and ability to work   - Feel the medication were futile and left them anxious and depressed | 26 |
| Pasma et.al,  2015 | 24  Netherland | - Symptom severity   - Pain, fatigue, disability - Experiences with medication - Previous experience with medication for other diseases or current experience with DMARD, side effects - Perception about medication and the illness - Expectations about medication, confrontation with having a chronic illness by the use of medication. - Information about medication/knowledge acquisition - In the early phase, patients started gathering information. - Information obtained from the rheumatologist, the medication information leaflet, or by searching the Internet. - Communication style and trust in the rheumatologist - The rheumatologist should build toward a trustful relationship, for instance by acknowledging fears about medication and explaining the treatment plan in detail. | 39 |
| Sanderson et.al, 2010 | 23  (UK) | - RA under control - Reduction in symptoms, commonly including a reduction in the magnitude or quality of pain, swelling, and fatigue, avoidance of joint damage - Doing things - Ability to carry out everyday activities and to plan them - Doing leisure activities - Mobility - Ability to work - Emotional health - Less stigmatizing, mood fluctuation, positive psychological functioning - Coping with illness - Personal control - Feeling well, return to/maintain a normal life | 40 |
| Sanderson et.al, 2010 | 23  (UK) | - Less pain - Doing everyday things - No more visible joint damage - More mobility - Enjoy life - More independent - Less fatigue - Doing everything you want | 41 |
| Scarpato et.al, 2009 | 802  (Italy) | - Dissatisfied with the current treatments, owing to inefficacy, side effects and inconvenience of administration - Reasons for the choice of i.v. administration were the safety of treatment at the hospital and the reassuring effect of physician presence. - The s.c. administration was chosen for the convenience of treatment and in particular for home treatment. | 42 |
| Chilton et.al, 2008 | 109  UK | - Lack of control, convenience and technical issues as influencing treatment choice - Lack of confident about self-administering treatment, thus prefer regular hospital attendance. | 43 |

**Table S5.** List of reviews was included to identified Disease Modifying Antirheumatic Drugs (DMARD) related outcome domain (n=5).

| Author | Number of RA patient | Important domains/Experience | Reference |
| --- | --- | --- | --- |
| Simons et.al, 2022 | Systematic  Review | - Most important determinants of treatment choice:   - Benefits   - Risks   - Administration method   - Cost (when included) - For detailed list of attributes see paper | 44 |
| Bywall et.al, 2022 | Review | - The highest ranked attributes were   - Improved functional capacity   - Reduced inflammation   - Reduced pain and fatigue and   - Risk of getting a severe side effect - The framework analysis revealed two overarching themes for further exploration: treatment goals and side effects. - ‘Treatment goals’ emerged from functional capacity, revealing two dimensions: physical functional capacity and psychosocial functional capacity. - ‘Side effects’ revealed that mild and severe side effects were the most important to discuss in shared decision-making. - For detailed list of attributes see paper | 45 |
| Zartab et.al, 2021 | Systematic review | - The most common attributes that were used in surveys were efficacy, adverse effect, route of administration, frequency of administration, and cost - For detailed list of attributes see paper | 46 |
| Durand et.al, 2020 | Systematic review | - Despite the heterogeneity of attributes in DCE studies,   - Treatment benefits (disease improvement) were usually more important than both non-serious (6 of 8 studies) and serious adverse events (5 of 8), and route of administration (7 of 9) - Subcutaneous therapy was often but not always preferred over intravenous therapy. - For detailed list of attributes see paper | 47 |
| Hsiao et.al, 2019 | Review | - Members of the largest group most concerned with the cost of medications - For detailed list of attributes see paper | 48 |

**Appendix II:** Evidence for the attribute level for DMARDs

**Table S1.** List of attributes identified from previous Discrete choice experiment/Conjoint analysis for RA patients in U.S. (n=8)

| **Author** | **Attributes** | **Levels** | **Reference** |
| --- | --- | --- | --- |
| Fraenkel et.al, 2018 | Route of administration | Pills | 49 |
|  |  | Injection |  |
|  |  | Infusion |  |
|  | Onset of action | 2 weeks |  |
|  |  | 6 weeks |  |
|  |  | 12 weeks |  |
|  | Bothersome side effects | 0% |  |
|  |  | 10% |  |
|  |  | 30% |  |
|  | Serious infection | 1% |  |
|  |  | 3% |  |
|  |  | 5% |  |
|  | Very rare side effects | Stomach or intestinal tear (0.2%) |  |
|  |  | Neurologic disease like multiple sclerosis (0.05%) |  |
|  |  | Permanent eye problems (0.3%) |  |
|  |  | Life threatening brain infection (0.005%) |  |
|  | Amount of information available | A lot (on the market for 27 years) |  |
|  |  | Some (on the market for 10 years |  |
|  |  | A little (on the market for 3 years) |  |
|  | Cost | Easy to afford |  |
|  |  | Somewhat affordable |  |
|  |  | Hard to afford |  |
| Husni et.al, 2017 | Reduction in the number of swollen joints | No reduction | 50 |
|  |  | 25% reduction |  |
|  |  | 50% reduction |  |
|  |  | 75% reduction |  |
|  | Reduction in pain | No reduction |  |
|  |  | 25% reduction |  |
|  |  | 50% reduction |  |
|  |  | 75% reduction |  |
|  | Improvement in physical function | No improvement |  |
|  |  | 20% improvement |  |
|  |  | 40% improvement |  |
|  |  | 60% improvement |  |
|  | Abnormal laboratory results | 10% |  |
|  |  | 20% |  |
|  |  | 30% |  |
|  | Cancer | 0% |  |
|  |  | 1% |  |
|  |  | 2% |  |
|  | Serious infection | 0% |  |
|  |  | 2% |  |
|  |  | 4% |  |
|  | Route of administration | Oral |  |
|  |  | Subcutaneous injection |  |
|  |  | Intravenous infusion |  |
|  | Dose frequency | Daily |  |
|  |  | Every two weeks |  |
|  |  | Monthly |  |
|  | Out-of-pocket cost per month | $0 |  |
|  |  | $50 |  |
|  |  | $100 |  |
|  |  |  |  |
| Louder et.al, 2016 | Route of administration | Oral | 51 |
|  |  | By self-injection |  |
|  |  | By infusion |  |
|  | Frequency of administration | Twice daily |  |
|  |  | Once weekly |  |
|  |  | Every other week |  |
|  |  | Once every 8 weeks |  |
|  | Chance of serious side effects | 4 of 100 people |  |
|  |  | 6 of 100 people |  |
|  |  | 8 of 100 people |  |
|  | Monthly cost to you (commercial) | $25 copay |  |
|  |  | $50 copay |  |
|  |  | $75 copay |  |
|  | Ability to reduce daily joint pain and joint swelling | 50 of 100 people |  |
|  |  | 52 of 100 people |  |
|  |  | 54 of 100 people |  |
|  |  | 58 of 100 people |  |
|  | Improvement in ability to perform daily tasks and activities | 32% |  |
|  |  | 33% |  |
|  |  | 34% |  |
|  |  | 36% |  |
|  | Medication burden (take with other medication) | No |  |
|  |  | Yes |  |
| Fraenkel et.al, 2015 | Decreased joint pain and swelling | 70 in 100 people feel much better, but occasionally have some joint pain and swelling | 52 |
|  |  | 40 in 100 people feel much better, but occasionally have some joint pain and swelling |  |
|  |  | People continue to have the same joint pain and swelling |  |
|  | Ability to get around and participate in social or leisure activities outside of the house | 70 in 100 people can get around much easier and participate in social and leisure activities outside of the house |  |
|  |  | 40 in 100 people can get around much easier and participate in social and leisure activities outside of the house |  |
|  |  | People continue to have the same problems getting around and participating in social and leisure activities outside of the houses |  |
|  | Slowing or stopping joint damage seen on x-rays | 80 in 100 people have no further bone damage seen on x-ray |  |
|  |  | 30 in 100 people have no further bone damage seen on x-rays |  |
|  |  | Bone damage seen on x-rays continues to progress at same rate |  |
|  | Ability to work | 80 in 100 people are able to keep working |  |
|  |  | 60 in 100 people are able to continue working |  |
|  |  | People continue to have the same problems being able to work |  |
|  | Risk of injection/infusion reaction | No risk of an injection reaction |  |
|  |  | 3 in 100 people get an infusion reaction (headache, nausea, fever) |  |
|  |  | 20 in 100 people get a rash or burning at the injection site |  |
|  | Risk of infection | No increased risk of infection |  |
|  |  | 20 in 100 people get bronchitis or sinusitis |  |
|  |  | 3 in 100 people get a serious infection (like pneumonia) requiring hospitalization |  |
|  | Risk of TB | No increased risk of TB |  |
|  |  | Very rare risk of TB (1 in 10,000 people) |  |
|  |  | Very rare risk of TB (5 in 10,000 people) |  |
|  | Risk of neurologic disease | No increased risk of neurologic disease |  |
|  |  | Extremely rare risk (a few reported cases) of a neurologic disease like MS |  |
|  |  | Extremely rare risk (a few reported cases) of a neurologic disease that usually causes death |  |
| Poulos et al., 2014 | Change of medicine working | 75 of 100 patients (75%) | 53 |
|  |  | 60 of 100 patients (60%) |  |
|  |  | 40 of 100 patients (40%) |  |
|  | Mode of administration | Injection at home |  |
|  |  | Infusion at a doctor's office or clinic |  |
|  | Time needed for infusion | No time (Injection at home) |  |
|  |  | 30 minutes (0.5 hours) |  |
|  |  | 1 hours |  |
|  |  | 2 hours |  |
|  |  | 4 hours |  |
|  | How often injection/infusions are taken | 2 treatments every week (104 times per year) |  |
|  |  | 1 treatment every 2 weeks (26 times per year) |  |
|  |  | 1 treatment every month (12 times per year) |  |
|  |  | 2 treatments 2 week apart every 6 months (4 times a year) |  |
|  | Chance of immediate serious treatment reaction | 1 of 100 patients (1%) |  |
|  |  | 10 of 100 patients (10%) |  |
|  |  | 25 of 100 patients (25%) |  |
|  | Chance of immediate mild treatment reaction | 1 of 100 patients (1%) |  |
|  |  | 10 of 100 patients (10%) |  |
|  |  | 25 of 100 patients (25%) |  |
| Constantinescu, et.al, 2009 | Chance of remission | 45 out of 100 patients go into remission | 54 |
|  |  | 25 out of 100 patients go into remission |  |
|  |  | 15 out of 100 patients go into remission |  |
|  | Symptom improvement | 70 out of 100 patients feel much better, but occasionally have some joint pain or swelling |  |
|  |  | 50 out of 100 patients feel much better, but occasionally have some joint pain or swelling |  |
|  |  | 40 out of 100 patients feel much better, but occasionally have some joint pain or swelling |  |
|  | Radiographic progression | No further bone damage seen on X-rays in 80 out of 100 patients |  |
|  |  | No further bone damage seen on X-rays in 50 out of 100 patients |  |
|  |  | No further bone damage seen on X-rays in 30 out of 100 patients |  |
|  | Route of administration | Pill you take once a week |  |
|  |  | Injection you give yourself once every 1–2 weeks |  |
|  |  | Intravenous infusion you get every 6–8 weeks |  |
|  | Injection reaction | No injection reactions |  |
|  |  | 30 in 100 patients get a rash or local burning at the site of injection |  |
|  |  | 3 in 100 patients will get a reaction during the infusion (headache, nausea, fever) |  |
|  | Reversible adverse events | No increased risk of nausea, dizziness or unusual tiredness |  |
|  |  | 10 in 100 people will have nausea, dizziness or unusual tiredness |  |
|  | Risk of lung injury | No increased risk of lung or liver injury |  |
|  |  | Rare risk of lung injury (2 in 100 patients) or liver injury (about 1 in 1000 patients) |  |
|  | Risk of tuberculosis | No increased risk of tuberculosis |  |
|  |  | Extremely rare risk of tuberculosis (about 1 in 10,000 patients) |  |
|  | Extremely rare adverse events | No increased risk of neurologic disease or heart failure. |  |
|  |  | Extremely rare risk of neurologic disease or heart failure (about 1 in 10,000 patients) |  |
|  | Risk of cancer | No increased risk of cancer |  |
|  |  | Possible increased risk of cancer (about 1 in 1000 patients) |  |
| Özdemir et.al, 2009 | Chance the medicine will work well | Works well in 25% of patients | 55 |
|  |  | Works well in 50% of patients |  |
|  |  | Works well in 75% of patients |  |
|  |  | Works well in 100% of patients |  |
|  | If it works, how long it takes to work after taking the medicine | 1 week |  |
|  |  | 2 weeks |  |
|  |  | 4 weeks |  |
|  |  | 10 weeks |  |
|  | Way you take the medicine | 1 injection every week at home |  |
|  |  | 1 injection every 2 weeks at home |  |
|  |  | 1 injection every 4 weeks at home |  |
|  |  | 1 infusion in every 8 weeks that takes 2 hours in your doctor’s office or clinic |  |
|  |  | 1 infusion in every 12 weeks that takes 30 minutes in your doctor’s office or clinic |  |
|  | How long the injection site is irritated after taking the medicine | You have injection site irritation for 15 minutes |  |
|  |  | You have injection site irritation for 1 hour |  |
|  |  | You have injection site irritation for 3 hours |  |
|  | Chance of serious infection | None |  |
|  |  | 5 out of 100 (5%) |  |
|  | Personal cost to you per month not covered by insurance | $50 |  |
|  |  | $150 |  |
|  |  | $300 |  |
|  |  | $600 |  |
|  |  | $1,000 |  |
|  |  |  |  |
| Fraenkel et.al., 2004 | Route | One pill taken once a day | 56 |
|  |  | Subcutaneous injection given by you or a partner at home twice a week |  |
|  |  | Intramuscular injection given by a nurse in a clinic once a week |  |
|  | Physician experience | Drug used to treat arthritis for more than 20 years |  |
|  |  | New drug with unknown long term safety profile |  |
|  | Onset | The drug starts working in 2 weeks |  |
|  |  | The drug starts working in 4 weeks (1 month) |  |
|  |  | The drug starts working in 8 weeks (2 months) |  |
|  | Chance of benefit | 75% (75 in 100) of people receiving this drug will feel much better |  |
|  |  | 60% (60 in 100) of people receiving this drug will feel much better |  |
|  |  | 45% (45 in 100) of people receiving this drug will feel much better |  |
|  | Bone erosions | 75% (75 in 100) do not develop any new bone damage at 1 year |  |
|  |  | 60% (60 in 100) do not develop any new bone damage at 1 year |  |
|  | Injection site reaction | 0% (no one) get a skin reaction at the injection site |  |
|  |  | 40% (40 in 100) get a skin reaction at the injection site |  |
|  | Rash | 0% (no one) gets an uncomfortable itchy rash |  |
|  |  | 10% (10 in 100) get an uncomfortable itchy rash |  |
|  |  | 40% (40 in 100) get an uncomfortable itchy rash |  |
|  | Oral ulcers | 0% (no one) gets painful mouth sores |  |
|  |  | 10% get painful mouth sores |  |
|  | Alopecia | 0% (no one) gets hair thinning |  |
|  |  | 10% (10 in 100) get hair thinning |  |
|  | Nausea/vomiting | 0% (no one) gets nausea |  |
|  |  | 10% (1 in 100) get nausea |  |
|  |  | 30% (30 in 100) get nausea |  |
|  | Diarrhea | 0% (no one) gets diarrhea |  |
|  |  | 10% (1 in 100) get diarrhea |  |
|  |  | 30% 30 in 100) get diarrhea |  |
|  | Cancer | The risk of cancer is not increased with this drug |  |
|  |  | Theoretical, but unproven, increased risk of cancer |  |
|  | Nephrotoxicity | 0% (no one) gets kidney damage from this drug |  |
|  |  | 1% (1 in 100) get kidney damage |  |
|  | Hepatotoxicity | 0% (no one) gets liver damage |  |
|  |  | 0.1% (1 in 1000) get liver damage |  |
|  | Pneumonitis | 0% (no one) gets lung damage |  |
|  |  | 0.1% (1 in 1000) get lung damage |  |
|  |  | 1% (1 in 100) get lung damage |  |
|  | Cost | Free |  |
|  |  | $5.00 co-pay per month |  |
|  |  | $15.00 co-pay per month |  |
|  |  | $30.00 co-pay per month |  |

**Appendix III:** Preference weight for Mixed Logit Model (MNL) and Latent Class Model (LCM)

**Table S1.** Preference weights of attributes of DMARDs from the mixed logit model

| **Attributes** | **Levels** | **Means** | | | | **Random parameter** | | | |
| --- | --- | --- | --- | --- | --- | --- | --- | --- | --- |
|  |  | **Coefficient** | **Standard Error** | **95% Confidence Interval** | | **Coefficient** | **Standard Error** | **95% Confidence Interval** | |
|  | Constant | 0.66014*** | 0.09087 | 0.48203 | 0.83825 |  |  |  |  |
| Chance of pain reduced by 50% or more | 10 out of 100 (10%) patients |  |  |  |  |  |  |  |  |
|  | 30 out of 100 (30%) patients | 0.1856 | 0.11919 | -0.04801 | 0.41921 | 0.75536*** | 0.13136 | 0.4979 | 1.01282 |
|  | 70 out of 100 (70%) patients | 1.09274*** | 0.10494 | 0.88706 | 1.29842 | 0.48508*** | 0.12336 | 0.2433 | 0.72685 |
| Chance of physical function improved by 50% or more | 10 out of 100 (10%) patients |  |  |  |  |  |  |  |  |
|  | 30 out of 100 (30%) patients | 0.27448** | 0.11674 | 0.04567 | 0.50329 | 0.31441 | 0.20685 | -0.091 | 0.71982 |
|  | 70 out of 100 (70%) patients | 0.64724*** | 0.09913 | 0.45295 | 0.84153 | 0.42923*** | 0.11936 | 0.19528 | 0.66318 |
| Chance of fatigue reduced by 10 points or more | 10 out of 100 (10%) patients |  |  |  |  |  |  |  |  |
|  | 30 out of 100 (30%) patients | 0.63543*** | 0.14281 | 0.35552 | 0.91534 | 0.29978 | 0.28203 | -0.25298 | 0.85254 |
|  | 70 out of 100 (70%) patients | 0.21882** | 0.09582 | 0.03101 | 0.40663 | 0.45881*** | 0.11033 | 0.24257 | 0.67506 |
| Chance of serious side effects | 0 out of 100 (0%) patients |  |  |  |  |  |  |  |  |
|  | 3 out of 100 (3%) patients | 0.12446 | 0.1122 | -0.09545 | 0.34437 | 0.16169 | 0.23745 | -0.3037 | 0.62708 |
|  | 10 out of 100 (10%) patients | -0.37804*** | 0.08677 | -0.54811 | -0.20797 | 0.2681** | 0.12757 | 0.01806 | 0.51814 |
| The way you take the medication | Oral, daily |  |  |  |  |  |  |  |  |
|  | Subcutaneous (SC) injection, every 1 week or every 2 weeks | -0.04069 | 0.09882 | -0.23438 | 0.15300 | 0.32841* | 0.1961 | -0.05593 | 0.71275 |
|  | Intravenous infusion, every 4 weeks or every 8 weeks | -0.03121 | 0.10076 | -0.22870 | 0.16628 | 0.43107** | 0.17392 | 0.09019 | 0.77195 |
|  | Intravenous infusion, every 6 months or every 12 months | 0.02339 | 0.09966 | -0.17194 | 0.21872 | 0.38006** | 0.1738 | 0.03943 | 0.7207 |
| Out-of-pocket cost | $0 (No Cost) per month |  |  |  |  |  |  |  |  |
|  | $25 per month | 0.7181*** | 0.11608 | 0.49058 | 0.94562 | 0.38172 | 0.23296 | -0.07487 | 0.83831 |
|  | $75 per month | -0.39378*** | 0.1365 | -0.66132 | -0.12624 | 0.73237** | 0.17576 | 0.38788 | 1.07686 |
|  | $150 per month | -1.21815*** | 0.15025 | -1.51264 | -0.92366 | 0.95649** | 0.15391 | 0.65483 | 1.25815 |
| Log likelihood of model | -1566.1094 | | | | | | | | |
| AIC | 3190.2 | | | | | | | | |
| McFadden Pseudo R-squared | 0.3052952 | | | | | | | | |

***, **, * ==> Significance at 1%, 5%, 10% level.

**Table S2.** Preference weights of attributes of DMARDs from the latent class model

1. Class 1

| **Attributes** | **Levels** | **Means** | | | |
| --- | --- | --- | --- | --- | --- |
|  |  | **Coefficient** | **Standard Error** | **95% Confidence Interval** | |
|  | Constant | 2.81986*** | 0.2786 | 2.27380 | 3.36592 |
| Chance of pain reduced by 50% or more | 10 out of 100 (10%) patients |  |  |  |  |
|  | 30 out of 100 (30%) patients | -0.00625 | 0.12161 | -0.24461 | 0.23211 |
|  | 70 out of 100 (70%) patients | 0.88337*** | 0.07741 | 0.73165 | 1.03509 |
| Chance of physical function improved by 50% or more | 10 out of 100 (10%) patients |  |  |  |  |
|  | 30 out of 100 (30%) patients | 0.41853** | 0.17985 | 0.06602 | 0.77104 |
|  | 70 out of 100 (70%) patients | 0.37592*** | 0.09464 | 0.19043 | 0.56141 |
| Chance of fatigue reduced by 10 points or more | 10 out of 100 (10%) patients |  |  |  |  |
|  | 30 out of 100 (30%) patients | 1.27432*** | 0.47177 | 0.34965 | 2.19899 |
|  | 70 out of 100 (70%) patients | -0.23099 | 0.24338 | -0.70801 | 0.24603 |
| Chance of serious side effects | 0 out of 100 (0%) patients |  |  |  |  |
|  | 3 out of 100 (3%) patients | 0.12545 | 0.21862 | -0.30305 | 0.55395 |
|  | 10 out of 100 (10%) patients | -0.30000** | 0.12434 | -0.54371 | -0.05629 |
| The way you take the medication | Oral, daily |  |  |  |  |
|  | Subcutaneous (SC) injection, every 1 week or every 2 weeks | -0.11464 | 0.08942 | -0.28990 | 0.06062 |
|  | Intravenous infusion, every 4 weeks or every 8 weeks | 0.07609 | 0.08069 | -0.08206 | 0.23424 |
|  | Intravenous infusion, every 6 months or every 12 months | 0.28825*** | 0.08398 | 0.12365 | 0.45285 |
| Out-of-pocket cost | $0 (No Cost) per month |  |  |  |  |
|  | $25 per month | 0.62565*** | 0.16649 | 0.29933 | 0.95197 |
|  | $75 per month | 0.05425 | 0.16577 | -0.27066 | 0.37916 |
|  | $150 per month | -1.02487*** | 0.16527 | -1.34880 | -0.70094 |

1. Class 2

| **Attributes** | **Levels** | **Means** | | | |
| --- | --- | --- | --- | --- | --- |
|  |  | **Coefficient** | **Standard Error** | **95% Confidence Interval** | |
|  | Constant | -0.97217*** | 0.14594 | -1.25821 | -0.68613 |
| Chance of pain reduced by 50% or more | 10 out of 100 (10%) patients |  |  |  |  |
|  | 30 out of 100 (30%) patients | 0.20009 | 0.16774 | -0.12868 | 0.52886 |
|  | 70 out of 100 (70%) patients | 0.61347*** | 0.13368 | 0.35146 | 0.87548 |
| Chance of physical function improved by 50% or more | 10 out of 100 (10%) patients |  |  |  |  |
|  | 30 out of 100 (30%) patients | 0.08109 | 0.16539 | -0.24307 | 0.40525 |
|  | 70 out of 100 (70%) patients | 0.58368*** | 0.14751 | 0.29456 | 0.87280 |
| Chance of fatigue reduced by 10 points or more | 10 out of 100 (10%) patients |  |  |  |  |
|  | 30 out of 100 (30%) patients | 0.58139*** | 0.16451 | 0.25895 | 0.90383 |
|  | 70 out of 100 (70%) patients | 0.13244 | 0.13863 | -0.13927 | 0.40415 |
| Chance of serious side effects | 0 out of 100 (0%) patients |  |  |  |  |
|  | 3 out of 100 (3%) patients | 0.03237 | 0.14902 | -0.25971 | 0.32445 |
|  | 10 out of 100 (10%) patients | -0.41711*** | 0.12863 | -0.66922 | -0.16500 |
| The way you take the medication | Oral, daily |  |  |  |  |
|  | Subcutaneous (SC) injection, every 1 week or every 2 weeks | -0.11846 | 0.15968 | -0.43143 | 0.19451 |
|  | Intravenous infusion, every 4 weeks or every 8 weeks | -0.31976* | 0.16923 | -0.65145 | 0.01193 |
|  | Intravenous infusion, every 6 months or every 12 months | -0.37531** | 0.16257 | -0.69395 | -0.05667 |
| Out-of-pocket cost | $0 (No Cost) per month |  |  |  |  |
|  | $25 per month | 0.99572*** | 0.17665 | 0.64949 | 1.34195 |
|  | $75 per month | -0.777*** | 0.23159 | -1.23092 | -0.32308 |
|  | $150 per month | -1.2987*** | 0.22013 | -1.73015 | -0.86725 |
| Log likelihood of model | -1445.98099 |  |  |  |  |
| AIC | 2960 |  |  |  |  |
| McFadden Pseudo R-squared | 0.3585825 |  |  |  |  |

***, **, * ==> Significance at 1%, 5%, 10% level.

**Table S3.** Difference in the demographic characteristics of the RA patients between latent class (Class 1 and Class2).

| **Characteristics** | **CLASS 1 (N=163)** | **CLASS 2 (N=65)** | **p-value** |
| --- | --- | --- | --- |
| Age in years, mean (SD) | 50.9 (13.19) | 48.9 (14.97) | 0.33 |
| Duration of Rheumatoid Arthritis (years), mean (SD) | 33.4 (9.73) | 32.58 (7.64) | 0.56 |
|  |  |  |  |
| Gender, N (%) |  |  |  |
| Male | 31 (19.02) | 9 (13.85) | 0.35 |
| Female | 132 (80.98) | 56 (86.15) |  |
| Race, N (%) |  |  |  |
| White | 145 (88.96) | 55 (84.62) | 0.22 |
| Black or African American | 11 (6.75) | 4 (6.15) |  |
| American Indian / Alaska Native | 2 (1.23) | 0 (0) |  |
| Asian / Native Hawaiian / Other Pacific Islander | 1 (0.61) | 3 (4.62) |  |
| Others | 1 (0.61) | 0 () |  |
| Two or more race | 3 (1.84) | 3 (4.62) |  |
| Marital Status, N (%) |  |  |  |
| Married or domestic partnership | 77 (47.24) | 36 (55.38) | 0.46 |
| Single, never married | 27 (16.56) | 13 (20) |  |
| Divorced or separated/Widowed/Others | 59 (36.2) | 16 (24.61) |  |
| Household Income, N (%) |  |  |  |
| $200,000 or more per year | 6 (3.68) | 1 (1.54) | 0.97 |
| $150,000 to $199,999 per year | 3 (1.84) | 1 (1.54) |  |
| $100,000 to $149,999 per year | 14 (8.59) | 6 (9.23) |  |
| $50,000 to $99,999 per year | 40 (24.54) | 17 (26.15) |  |
| Less than $50,000 per year | 96 (57.67) | 38 (58.46) |  |
| Prefer not to say | 4 (3.68) | 2 (3.08) |  |
| Education, N (%) |  |  | 0.04 |
| Graduate or professional degree (e.g., MBA, MS, MD, PhD) | 9 (5.52) | 4 (6.15) |  |
| 4-year college degree (e.g., BA, BS) | 15 (9.2) | 15 (23.08) |  |
| 2-year college degree (Associate’s degree) | 25 (15.34) | 13 (20) |  |
| Technical / vocational training | 12 (7.36) | 7 (10.77) |  |
| Some college but no degree | 49 (30.06) | 12 (18.46) |  |
| High school or less than high school | 53 (32.51) | 14 (21.54) |  |
| Employment Status, N (%) |  |  | 0.32 |
| Employed full-time | 47 (28.83) | 13 (20) |  |
| Employed part-time | 12 (7.36) | 7 (10.77) |  |
| Self-employed | 13 (7.98) | 5 (7.69) |  |
| Stay-at-home spouse | 7 (4.29) | 8 (12.31) |  |
| Student | 2 (1.23) | 1 (1.54) |  |
| Retired | 31 (19.02) | 11 (16.92) |  |
| Unemployed | 8 (4.91) | 6 (9.32) |  |
| Disabled | 41 (25.15) | 14 (21.54) |  |
| Others (Please specify) | 2 (1.23) | 0 ( ) |  |
| Health Insurance, N (%) |  |  |  |
| Medicare | 58 (35.58) | 22 (33.85) | 0.8 |
| Medicaid | 65 (39.88) | 23 (35.38) | 0.52 |
| Veterans Affairs | 4 (2.45) | 2 (3.08) | 0.79 |
| Tricare | 5 (3.07) | 3 (1.32) | 0.56 |
| Health insurance through my workplace or employer | 36 (22.09) | 15 (23.08) | 0.87 |
| Health insurance purchased directly from marketplace | 11 (6.75) | 7 (3.07) | 0.3 |
| I do not have health insurance | 5 (3.07) | 3 (4.62) | 0.56 |
| Others (Please specify) | 11 (6.75) | 4 (6.15) | 0.87 |
| Comorbidities, N (%) |  |  |  |
| High blood pressure | 72 (44.17) | 26 (40) | 0.56 |
| Heart diseases | 16 (9.82) | 5 (7.69) | 0.61 |
| High blood lipid levels e.g., cholesterol, triglyceride | 35 (21.47) | 13 (20) | 0.8 |
| Cancer | 14 (8.59) | 1 (1.54) | 0.05 |
| Ulcer or stomach diseases | 20 (12.27) | 7 (10.77) | 0.07 |
| Blood diseases | 7 (4.29) | 2 (3.08) | 0.66 |
| Kidney diseases | 8 (4.91) | 0 ( ) | 0.06 |
| Lung diseases | 17 (10.43) | 5 (7.69) | 0.52 |
| Liver diseases | 5 (3.07) | 2 (3.08) | 0.99 |
| Diabetes | 26 (15.95) | 9 (13.85) | 0.69 |
| Back pain | 111 (38.1) | 38 (58.46) | 0.16 |
| Depression | 99 (60.74) | 34 (52.31) | 0.24 |
| Obesity | 45 (27.61) | 18 (27.69) | 0.98 |
| Others (Please specify) | 30 (18.4) | 15 (23.08) | 0.42 |
| None | 7 (4.29) | 6 (9.23) | 0.14 |
| Health Status, N (%) |  |  | 0.08 |
| Excellent | 0 (0) | 1 (1.54) |  |
| Very good | 26 (15.95) | 6 (9.23) |  |
| Good | 60 (36.81) | 30 (46.15) |  |
| Fair | 60 (36.81) | 26 (40) |  |
| Poor | 17 (10.43) | 2 (3.08) |  |
| Willing to pay more than $150 |  |  | 0.0025 |
| Yes | 55 (33.74) | 9 (13.85) |  |
| No | 108 (66.26) | 56 (86.15) |  |

Note: Independent t-tests were conducted to compare continuous variables, while Chi-square tests were used to assess differences in categorical variables.

**Appendix IV:** Preference weights of attributes of DMARDs with interaction between fatigue and physical function

**Figure S1.** Preference weights of attributes of DMARDs from the mixed logit model with interaction between fatigue and physical function

**Figure S2.** Preference weights of attributes of DMARDs from the latent class model with interaction between fatigue and physical function

**References**

1. Carandang K, Vigen CLP, Ortiz E, Pyatak EA. Re-conceptualizing functional status through experiences of young adults with inflammatory arthritis. *Rheumatol Int*. Feb 2020;40(2):273-282. doi:10.1007/s00296-019-04368-8

2. Serban S, Dietrich T, Lopez-Oliva I, et al. Attitudes towards Oral Health in Patients with Rheumatoid Arthritis: A Qualitative Study Nested within a Randomized Controlled Trial. *JDR Clin Trans Res*. Oct 2019;4(4):360-370. doi:10.1177/2380084419833694

3. Barton JL, Hulen E, Schue A, et al. Experience and Context Shape Patient and Clinician Goals For Treatment of Rheumatoid Arthritis: A Qualitative Study. *Arthritis Care Res (Hoboken)*. Nov 2018;70(11):1614-1620. doi:10.1002/acr.23541

4. Taylor P, Manger B, Alvaro-Gracia J, et al. Patient perceptions concerning pain management in the treatment of rheumatoid arthritis. *J Int Med Res*. Jul-Aug 2010;38(4):1213-24. doi:10.1177/147323001003800402

5. Iaquinta ML, Larrabee JH. Phenomenological lived experience of patients with rheumatoid arthritis. *J Nurs Care Qual*. Jul-Sep 2004;19(3):280-9. doi:10.1097/00001786-200407000-00016

6. Chen SH, Yu KHD, Kao YC, Shao JH. It Is Like a Puppet Show-Experiences of Rheumatoid Arthritis Among Adult Chinese: A Qualitative Study. *Clin Nurs Res*. Jun 2022;31(5):795-802. doi:10.1177/10547738211037467

7. Pedraz-Marcos A, Palmar-Santos AM, Hale CA, et al. Living With Rheumatoid Arthritis in Spain: A Qualitative Study of Patient Experience and the Role of Health Professionals. *Clin Nurs Res*. Nov 2020;29(8):551-560. doi:10.1177/1054773818791096

8. Loyola-Sanchez A, Hazlewood G, Crowshoe L, et al. Qualitative Study of Treatment Preferences for Rheumatoid Arthritis and Pharmacotherapy Acceptance: Indigenous Patient Perspectives. *Arthritis Care Res (Hoboken)*. Apr 2020;72(4):544-552. doi:10.1002/acr.23869

9. Walter MJ, Van't Spijker A, Pasma A, Hazes JM, Luime JJ. Focus group interviews reveal reasons for differences in the perception of disease activity in rheumatoid arthritis. *Qual Life Res*. Feb 2017;26(2):291-298. doi:10.1007/s11136-016-1369-4

10. Poh LW, He HG, Chan WCS, et al. Experiences of Patients With Rheumatoid Arthritis: A Qualitative Study. *Clin Nurs Res*. Jun 2017;26(3):373-393. doi:10.1177/1054773816629897

11. Flurey CA, Hewlett S, Rodham K, White A, Noddings R, Kirwan JR. "You Obviously Just Have to Put on a Brave Face": A Qualitative Study of the Experiences and Coping Styles of Men With Rheumatoid Arthritis. *Arthritis Care Res (Hoboken)*. Mar 2017;69(3):330-337. doi:10.1002/acr.22951

12. Bala SV, Samuelson K, Hagell P, et al. Living with persistent rheumatoid arthritis: a BARFOT study. *J Clin Nurs*. Sep 2017;26(17-18):2646-2656. doi:10.1111/jocn.13691

13. van der Elst K, Meyfroidt S, De Cock D, et al. Unraveling Patient-Preferred Health and Treatment Outcomes in Early Rheumatoid Arthritis: A Longitudinal Qualitative Study. *Arthritis Care Res (Hoboken)*. Sep 2016;68(9):1278-87. doi:10.1002/acr.22824

14. Ter Wee MM, van Tuyl LH, Blomjous BS, Lems WF, Boers M, Terwee CB. Content validity of the Dutch Rheumatoid Arthritis Impact of Disease (RAID) score: results of focus group discussions in established rheumatoid arthritis patients and comparison with the International Classification of Functioning, Disability and Health core set for rheumatoid arthritis. *Arthritis Res Ther*. Jan 22 2016;18:22. doi:10.1186/s13075-015-0911-z

15. Ebbevi D, Forsberg HH, Essén A, Ernestam S. Value-Based Health Care for Chronic Care: Aligning Outcomes Measurement with the Patient Perspective. *Qual Manag Health Care*. Oct/Dec 2016;25(4):203-212. doi:10.1097/qmh.0000000000000115

16. van Tuyl LH, Hewlett S, Sadlonova M, et al. The patient perspective on remission in rheumatoid arthritis: 'You've got limits, but you're back to being you again'. *Ann Rheum Dis*. Jun 2015;74(6):1004-10. doi:10.1136/annrheumdis-2013-204798

17. Östlund G, Björk M, Thyberg I, et al. Emotions related to participation restrictions as experienced by patients with early rheumatoid arthritis: a qualitative interview study (the Swedish TIRA project). *Clin Rheumatol*. 2014;33(10):1403-13. doi:10.1007/s10067-014-2667-2

18. Flurey CA, Morris M, Richards P, Hughes R, Hewlett S. It's like a juggling act: rheumatoid arthritis patient perspectives on daily life and flare while on current treatment regimes. *Rheumatology (Oxford)*. Apr 2014;53(4):696-703. doi:10.1093/rheumatology/ket416

19. Sanderson T, Hewlett S, Richards P, Morris M, Calnan M. Utilizing qualitative data from nominal groups: exploring the influences on treatment outcome prioritization with rheumatoid arthritis patients. *J Health Psychol*. Jan 2012;17(1):132-42. doi:10.1177/1359105311410758

20. Buitinga L, Braakman-Jansen LM, Taal E, van de Laar MA. Future expectations and worst-case future scenarios of patients with rheumatoid arthritis: a focus group study. *Musculoskeletal Care*. Dec 2012;10(4):240-7. doi:10.1002/msc.1026

21. Lacaille D, White MA, Backman CL, Gignac MA. Problems faced at work due to inflammatory arthritis: new insights gained from understanding patients' perspective. *Arthritis Rheum*. Oct 15 2007;57(7):1269-79. doi:10.1002/art.23002

22. Ahlmén M, Nordenskiöld U, Archenholtz B, et al. Rheumatology outcomes: the patient's perspective. A multicentre focus group interview study of Swedish rheumatoid arthritis patients. *Rheumatology (Oxford)*. Jan 2005;44(1):105-10. doi:10.1093/rheumatology/keh412

23. Hwang EJ, Kim YH, Jun SS. Lived experience of Korean women suffering from rheumatoid arthritis: a phenomenological approach. *Int J Nurs Stud*. Mar 2004;41(3):239-46. doi:10.1016/s0020-7489(03)00132-9

24. Carr A, Hewlett S, Hughes R, et al. Rheumatology outcomes: the patient's perspective. *J Rheumatol*. Apr 2003;30(4):880-3.

25. McPherson KM, Brander P, Taylor WJ, McNaughton HK. Living with arthritis--what is important? *Disabil Rehabil*. Nov 10 2001;23(16):706-21. doi:10.1080/09638280110049919

26. Bekker CL, Bossina S, de Vera MA, et al. Patient Perspectives on Outcome Domains of Medication Adherence Trials in Inflammatory Arthritis: An International OMERACT Focus Group Study. *J Rheumatol*. Sep 2021;48(9):1480-1487. doi:10.3899/jrheum.201568

27. Van der Elst K, Mathijssen EGE, Landgren E, et al. What do patients prefer? A multinational, longitudinal, qualitative study on patient-preferred treatment outcomes in early rheumatoid arthritis. *RMD Open*. Sep 2020;6(2)doi:10.1136/rmdopen-2020-001339

28. Parenti G, Tomaino SCM, Cipolletta S. The experience of living with rheumatoid arthritis: A qualitative metasynthesis. *J Clin Nurs*. Nov 2020;29(21-22):3922-3936. doi:10.1111/jocn.15428

29. Donnelly S, Manning M, Mannan H, Wilson AG, Kroll T. Renegotiating dimensions of the self: A systematic review and qualitative evidence synthesis of the lived experience of self-managing rheumatoid arthritis. *Health Expect*. Dec 2020;23(6):1388-1411. doi:10.1111/hex.13122

30. Michaud K, Pope J, van de Laar M, et al. Systematic Literature Review of Residual Symptoms and an Unmet Need in Patients With Rheumatoid Arthritis. *Arthritis Care Res (Hoboken)*. Nov 2021;73(11):1606-1616. doi:10.1002/acr.24369

31. Kelly A, Tymms K, Tunnicliffe DJ, et al. Patients' Attitudes and Experiences of Disease-Modifying Antirheumatic Drugs in Rheumatoid Arthritis and Spondyloarthritis: A Qualitative Synthesis. *Arthritis Care Res (Hoboken)*. Apr 2018;70(4):525-532. doi:10.1002/acr.23329

32. Hulen E, Ervin A, Schue A, et al. Patient goals in rheumatoid arthritis care: A systematic review and qualitative synthesis. *Musculoskeletal Care*. Dec 2017;15(4):295-303. doi:10.1002/msc.1173

33. Rendas-Baum R, Bayliss M, Kosinski M, et al. Measuring the effect of therapy in rheumatoid arthritis clinical trials from the patient's perspective. *Curr Med Res Opin*. Jul 2014;30(7):1391-403. doi:10.1185/03007995.2014.896328

34. Hoving JL, van Zwieten MC, van der Meer M, Sluiter JK, Frings-Dresen MH. Work participation and arthritis: a systematic overview of challenges, adaptations and opportunities for interventions. *Rheumatology (Oxford)*. Jul 2013;52(7):1254-64. doi:10.1093/rheumatology/ket111

35. Singh JA, Tornberg H, Goodman SM. Pop a pill or give myself a shot? Patient perspectives of disease-modifying anti-rheumatic drug choice for rheumatoid arthritis. *Joint Bone Spine*. Jan 2021;88(1):105053. doi:10.1016/j.jbspin.2020.07.002

36. Binder-Finnema P, Dzurilla K, Hsiao B, Fraenkel L. Qualitative Exploration of Triangulated, Shared Decision-Making in Rheumatoid Arthritis. *Arthritis Care Res (Hoboken)*. Dec 2019;71(12):1576-1582. doi:10.1002/acr.23801

37. Andersen KM, Kelly A, Lyddiatt A, et al. Patient Perspectives on DMARD Safety Concerns in Rheumatology Trials: Results from Inflammatory Arthritis Patient Focus Groups and OMERACT Attendees Discussion. *J Rheumatol*. Sep 2019;46(9):1168-1172. doi:10.3899/jrheum.181185

38. Shaw Y, Metes ID, Michaud K, et al. Rheumatoid Arthritis Patients' Motivations for Accepting or Resisting Disease-Modifying Antirheumatic Drug Treatment Regimens. *Arthritis Care Res (Hoboken)*. Apr 2018;70(4):533-541. doi:10.1002/acr.23301

39. Pasma A, van 't Spijker A, Luime JJ, Walter MJ, Busschbach JJ, Hazes JM. Facilitators and barriers to adherence in the initiation phase of Disease-modifying Antirheumatic Drug (DMARD) use in patients with arthritis who recently started their first DMARD treatment. *J Rheumatol*. Mar 2015;42(3):379-85. doi:10.3899/jrheum.140693

40. Sanderson T, Morris M, Calnan M, Richards P, Hewlett S. What outcomes from pharmacologic treatments are important to people with rheumatoid arthritis? Creating the basis of a patient core set. *Arthritis Care Res (Hoboken)*. May 2010;62(5):640-6. doi:10.1002/acr.20034

41. Sanderson T, Morris M, Calnan M, Richards P, Hewlett S. Patient perspective of measuring treatment efficacy: the rheumatoid arthritis patient priorities for pharmacologic interventions outcomes. *Arthritis Care Res (Hoboken)*. May 2010;62(5):647-56. doi:10.1002/acr.20151

42. Scarpato S, Antivalle M, Favalli EG, et al. Patient preferences in the choice of anti-TNF therapies in rheumatoid arthritis. Results from a questionnaire survey (RIVIERA study). *Rheumatology (Oxford)*. Feb 2010;49(2):289-94. doi:10.1093/rheumatology/kep354

43. Chilton F, Collett RA. Treatment choices, preferences and decision-making by patients with rheumatoid arthritis. *Musculoskeletal Care*. Mar 2008;6(1):1-14. doi:10.1002/msc.110

44. Simons G, Caplan J, DiSantostefano RL, et al. Systematic review of quantitative preference studies of treatments for rheumatoid arthritis among patients and at-risk populations. *Arthritis Research & Therapy*. 2022/02/22 2022;24(1):55. doi:10.1186/s13075-021-02707-4

45. Bywall KS, Esbensen BA, Lason M, Heidenvall M, Erlandsson I, Johansson JV. Functional capacity vs side effects: treatment attributes to consider when individualising treatment for patients with rheumatoid arthritis. *Clin Rheumatol*. Mar 2022;41(3):695-704. doi:10.1007/s10067-021-05961-8

46. Zartab S, Nikfar S, Karimpour-Fard N, et al. A Systematic Review of Discrete Choice Experiment Studies in Rheumatoid Arthritis Biological Medicines. *Mediterr J Rheumatol*. Jun 2021;32(2):104-111. doi:10.31138/mjr.32.2.104

47. Durand C, Eldoma M, Marshall DA, Bansback N, Hazlewood GS. Patient Preferences for Disease-modifying Antirheumatic Drug Treatment in Rheumatoid Arthritis: A Systematic Review. *J Rheumatol*. Feb 2020;47(2):176-187. doi:10.3899/jrheum.181165

48. Hsiao B, Fraenkel L. Patient preferences for rheumatoid arthritis treatment. *Curr Opin Rheumatol*. May 2019;31(3):256-263. doi:10.1097/bor.0000000000000591

49. Fraenkel L, Nowell WB, Michel G, Wiedmeyer C. Preference phenotypes to facilitate shared decision-making in rheumatoid arthritis. *Ann Rheum Dis*. May 2018;77(5):678-683. doi:10.1136/annrheumdis-2017-212407

50. Husni ME, Betts KA, Griffith J, Song Y, Ganguli A. Benefit-risk trade-offs for treatment decisions in moderate-to-severe rheumatoid arthritis: focus on the patient perspective. *Rheumatol Int*. Sep 2017;37(9):1423-1434. doi:10.1007/s00296-017-3760-z

51. Louder AM, Singh A, Saverno K, et al. Patient Preferences Regarding Rheumatoid Arthritis Therapies: A Conjoint Analysis. *Am Health Drug Benefits*. Apr 2016;9(2):84-93.

52. Fraenkel L, Cunningham M, Peters E. Subjective numeracy and preference to stay with the status quo. *Med Decis Making*. Jan 2015;35(1):6-11. doi:10.1177/0272989x14532531

53. Poulos C, Hauber AB, González JM, Turpcu A. Patients' willingness to trade off between the duration and frequency of rheumatoid arthritis treatments. *Arthritis Care Res (Hoboken)*. Jul 2014;66(7):1008-15. doi:10.1002/acr.22265

54. Constantinescu F, Goucher S, Weinstein A, Smith W, Fraenkel L. Understanding why rheumatoid arthritis patient treatment preferences differ by race. *Arthritis Rheum*. Apr 15 2009;61(4):413-8. doi:10.1002/art.24338

55. Ozdemir S, Johnson FR, Hauber AB. Hypothetical bias, cheap talk, and stated willingness to pay for health care. *J Health Econ*. Jul 2009;28(4):894-901. doi:10.1016/j.jhealeco.2009.04.004

56. Fraenkel L, Bogardus ST, Concato J, Felson DT, Wittink DR. Patient preferences for treatment of rheumatoid arthritis. *Ann Rheum Dis*. Nov 2004;63(11):1372-8. doi:10.1136/ard.2003.019422
